# Supplementary material for: Waste tea residue adsorption coupled with electrocoagulation for improvement of copper and nickel ions removal from simulated wastewater
Source: Research Square preprint supplement (doi:10.21203/rs.3.rs-746126/v1), 2021-08-23
Supplement: Supplementary file 1 [file 0a27afe9a10384038264eb51.docx]

**Table 2.**

| Sr. No. | Water sample analyzed | Conc. Cu2+ and Ni2+ before ADS (mg.L-1) | | Conc. Cu2+ and Ni2+ after ADS (mg.L-1) | | Conc. Cu2+ and Ni2+ after ADS/EC (mg.L-1) | | Maximum adsorption capacity (qe)(mg.g-1) | | % Removal for ADS/EC process | |
| --- | --- | --- | --- | --- | --- | --- | --- | --- | --- | --- | --- |
| Copper(II) | Nickel(II) | Copper(II) | Nickel(II) | Copper(II) | Nickel(II) | Copper(II) | Nickel(II) | Copper(II) | Nickel(II) |
| 1 | Changchun cars industry wastewater | 107.1 | 84.5 | 41.7 | 33.6 | 2.03 | 2.4 | 10.507 | 8.247 | 98.104 | 97.7591 |
| 2 | Xiao Hetai wastewater treatment plant | 82.6 | 72.1 | 32.4 | 30.2 | 1.44 | 1.7 | 8.116 | 7.04 | 98.256 | 97.94189 |
| 3 | Yinma River | 61.3 | 40.03 | 23.8 | 21.4 | 0.17 | 1.03 | 6.113 | 3.9 | 99.722 | 98.31974 |
